# Supplementary material
Source: HighWire-hosted journal article supplement (http://thorax.bmjjournals.com/highwire/filestream/174050/field_highwire_adjunct_files/4/62185webonlyfig5.pdf)

# Figure E: Age-specific mortality rates for asthma, England & Wales 1958-2004

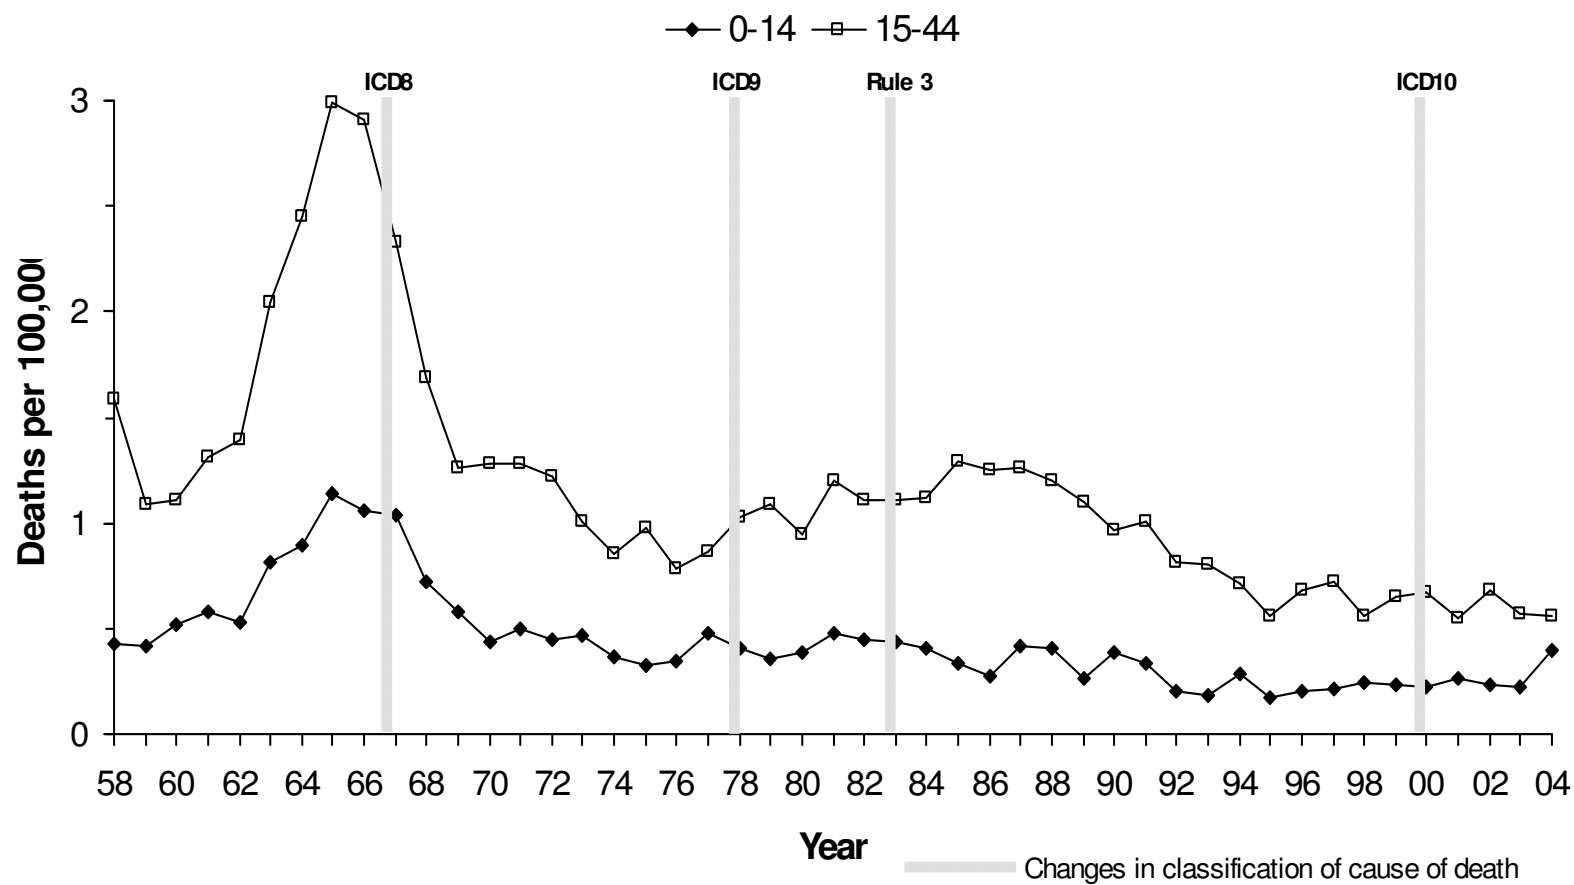

Supplement: 62185webonlyfig5.pdf [file 62185webonlyfig5.pdf]
